# Supplementary material
Source: publisher figshare collection journal article supplement (https://acs.figshare.com/ndownloader/files/5095006)
Supplement: Supplementary file 1 [file 5095006]

 
data_a 
 
_audit_creation_method            SHELXL-97 
_chemical_name_systematic 
; 
 ? 
; 
_chemical_name_common             ? 
_chemical_melting_point           ? 
_chemical_formula_moiety          ? 
_chemical_formula_sum 
 'C27 H29 Br Cl N O3 S2' 
_chemical_formula_weight          594.99 
 
loop_ 
 _atom_type_symbol 
 _atom_type_description 
 _atom_type_scat_dispersion_real 
 _atom_type_scat_dispersion_imag 
 _atom_type_scat_source 
 'C'  'C'   0.0033   0.0016 
 'International Tables Vol C Tables 4.2.6.8 and 6.1.1.4' 
 'H'  'H'   0.0000   0.0000 
 'International Tables Vol C Tables 4.2.6.8 and 6.1.1.4' 
 'N'  'N'   0.0061   0.0033 
 'International Tables Vol C Tables 4.2.6.8 and 6.1.1.4' 
 'O'  'O'   0.0106   0.0060 
 'International Tables Vol C Tables 4.2.6.8 and 6.1.1.4' 
 'S'  'S'   0.1246   0.1234 
 'International Tables Vol C Tables 4.2.6.8 and 6.1.1.4' 
 'Cl'  'Cl'   0.1484   0.1585 
 'International Tables Vol C Tables 4.2.6.8 and 6.1.1.4' 
 'Br'  'Br'  -0.2901   2.4595 
 'International Tables Vol C Tables 4.2.6.8 and 6.1.1.4' 
 
_symmetry_cell_setting            'Orthorhombic' 
_symmetry_space_group_name_H-M    'P2(1)2(1)2(1)' 
 
loop_ 
 _symmetry_equiv_pos_as_xyz 
 'x, y, z' 
 '-x+1/2, -y, z+1/2' 
 '-x, y+1/2, -z+1/2' 
 'x+1/2, -y+1/2, -z' 
 
_cell_length_a                    6.7184(13) 
_cell_length_b                    17.702(4) 
_cell_length_c                    22.591(5) 
_cell_angle_alpha                 90.00 
_cell_angle_beta                  90.00 
_cell_angle_gamma                 90.00 
_cell_volume                      2686.8(9) 
_cell_formula_units_Z             4 
_cell_measurement_temperature     293(2) 
_cell_measurement_reflns_used     15620 
_cell_measurement_theta_min       2.30 
_cell_measurement_theta_max       25.02 
 
_exptl_crystal_description        'Block' 
_exptl_crystal_colour             'Colourless' 
_exptl_crystal_size_max           0.50 
_exptl_crystal_size_mid           0.25 
_exptl_crystal_size_min           0.15 
_exptl_crystal_density_meas       ? 
_exptl_crystal_density_diffrn     1.471 
_exptl_crystal_density_method     'not measured' 
_exptl_crystal_F_000              1224 
_exptl_absorpt_coefficient_mu     1.814 
_exptl_absorpt_correction_type    'Empirical' 
_exptl_absorpt_correction_T_min   0.404 
_exptl_absorpt_correction_T_max   0.762 
_exptl_absorpt_process_details     
; 
ABSCOR by T.Higashi    8 March, 1995
  
; 
 
_diffrn_ambient_temperature       293(2) 
_diffrn_radiation_wavelength      0.71073 
_diffrn_radiation_type            MoK\a 
_diffrn_radiation_source          'fine-focus sealed tube' 
_diffrn_radiation_monochromator   graphite 
_diffrn_measurement_device_type   'Rigaku RAXIS RAPID IP' 
_diffrn_measurement_method        'Oscillation' 
_diffrn_detector_area_resol_mean  '100x100 microns' 
_diffrn_standards_number          ? 
_diffrn_standards_interval_count  ? 
_diffrn_standards_interval_time   ? 
_diffrn_standards_decay_%         ? 
_diffrn_reflns_number             15620 
_diffrn_reflns_av_R_equivalents   0.0851 
_diffrn_reflns_av_sigmaI/netI     0.1245 
_diffrn_reflns_limit_h_min        -7 
_diffrn_reflns_limit_h_max        7 
_diffrn_reflns_limit_k_min        -21 
_diffrn_reflns_limit_k_max        21 
_diffrn_reflns_limit_l_min        -26 
_diffrn_reflns_limit_l_max        26 
_diffrn_reflns_theta_min          2.30 
_diffrn_reflns_theta_max          25.02 
_reflns_number_total              2711 
_reflns_number_gt                 1251 
_reflns_threshold_expression      >2sigma(I) 
 
_computing_data_collection        'Molecular Structure Corporation (1994)'
                                  
_computing_cell_refinement        'Molecular Structure Corporation (1994)'
                                  
_computing_data_reduction         'Sheldrick, G. M. (1997) SHELXS97, Program'
                               
_computing_structure_solution     'Sheldrick, G. M. (1997) SHELXS97, Program'
                                  
_computing_structure_refinement   'Sheldrick, G. M. (1997) SHELXL97, Program'
                                  
_computing_molecular_graphics     'Interactive Molecular Graphics XP, Virsion'
                                  
_computing_publication_material   'Sheldrick, G. M. (1997) SHELXL97, Program'

_refine_special_details 
; 
 Refinement of F^2^ against ALL reflections.  The weighted R-factor wR and 
 goodness of fit S are based on F^2^, conventional R-factors R are based 
 on F, with F set to zero for negative F^2^. The threshold expression of 
 F^2^ > 2sigma(F^2^) is used only for calculating R-factors(gt) etc. and is 
 not relevant to the choice of reflections for refinement.  R-factors based 
 on F^2^ are statistically about twice as large as those based on F, and R- 
 factors based on ALL data will be even larger. 
; 
 
_refine_ls_structure_factor_coef  Fsqd  
_refine_ls_matrix_type            full 
_refine_ls_weighting_scheme       calc  
_refine_ls_weighting_details 
 'calc w=1/[\s^2^(Fo^2^)+(0.0005P)^2^+0.0000P] where P=(Fo^2^+2Fc^2^)/3' 
_atom_sites_solution_primary      direct 
_atom_sites_solution_secondary    difmap 
_atom_sites_solution_hydrogens    'hydrogen atoms are generated by HFIX'
                                  
_refine_ls_hydrogen_treatment     'hydrogen coordinates ride on the coordinates'

_refine_ls_extinction_method      SHELXL 
_refine_ls_extinction_coef        0.00619(16) 
_refine_ls_extinction_expression 
 'Fc^*^=kFc[1+0.001xFc^2^\l^3^/sin(2\q)]^-1/4^' 
_refine_ls_abs_structure_details 
 'Flack H D (1983), Acta Cryst. A39, 876-881' 
_refine_ls_abs_structure_Flack    0.0(2) 
_refine_ls_number_reflns          2711 
_refine_ls_number_parameters      326 
_refine_ls_number_restraints      0 
_refine_ls_R_factor_all           0.0982 
_refine_ls_R_factor_gt            0.0347 
_refine_ls_wR_factor_ref          0.0482 
_refine_ls_wR_factor_gt           0.0424 
_refine_ls_goodness_of_fit_ref    0.783 
_refine_ls_restrained_S_all       0.783 
_refine_ls_shift/su_max           0.001 
_refine_ls_shift/su_mean          0.000 
 
loop_ 
 _atom_site_label 
 _atom_site_type_symbol 
 _atom_site_fract_x 
 _atom_site_fract_y 
 _atom_site_fract_z 
 _atom_site_U_iso_or_equiv 
 _atom_site_adp_type 
 _atom_site_occupancy 
 _atom_site_symmetry_multiplicity 
 _atom_site_calc_flag 
 _atom_site_refinement_flags 
 _atom_site_disorder_assembly 
 _atom_site_disorder_group 
Br1 Br 0.62903(15) 0.91946(4) 0.86361(2) 0.0874(3) Uani 1 1 d . . . 
Cl Cl 1.1173(3) 0.84408(9) 1.06560(8) 0.0976(7) Uani 1 1 d . . . 
S1 S 0.6449(3) 1.18362(8) 1.05366(7) 0.0481(5) Uani 1 1 d . . . 
S2 S 0.8904(3) 0.94835(8) 1.16007(7) 0.0605(6) Uani 1 1 d . . . 
O1 O 0.9976(6) 1.0930(2) 1.16206(18) 0.0687(14) Uani 1 1 d . . . 
O2 O 0.4420(6) 1.1581(2) 1.05744(17) 0.0612(13) Uani 1 1 d . . . 
O3 O 0.7618(6) 1.1597(2) 1.00385(15) 0.0640(15) Uani 1 1 d . . . 
N N 0.7661(7) 1.1635(3) 1.11823(17) 0.0358(14) Uani 1 1 d . . . 
C1 C 0.8765(10) 1.2308(3) 1.1392(2) 0.0412(15) Uani 1 1 d . . . 
H1 H 1.0117 1.2308 1.1229 0.049 Uiso 1 1 calc R . . 
C2 C 0.8840(10) 1.2406(3) 1.2076(2) 0.0488(17) Uani 1 1 d . . . 
H2A H 0.8019 1.2034 1.2274 0.059 Uiso 1 1 calc R . . 
H2B H 1.0193 1.2371 1.2224 0.059 Uiso 1 1 calc R . . 
C3 C 0.7996(8) 1.3210(3) 1.2154(2) 0.0477(18) Uani 1 1 d . . . 
H3 H 0.7623 1.3329 1.2563 0.057 Uiso 1 1 calc R . . 
C4 C 0.9434(9) 1.3780(3) 1.1882(2) 0.058(2) Uani 1 1 d . . . 
H4A H 1.0794 1.3677 1.2002 0.070 Uiso 1 1 calc R . . 
H4B H 0.9089 1.4292 1.1996 0.070 Uiso 1 1 calc R . . 
C5 C 0.9164(10) 1.3661(3) 1.1200(2) 0.057(2) Uani 1 1 d . . . 
H5A H 0.8653 1.4113 1.1010 0.068 Uiso 1 1 calc R . . 
H5B H 1.0405 1.3516 1.1013 0.068 Uiso 1 1 calc R . . 
C6 C 0.7632(9) 1.3014(3) 1.1182(2) 0.0418(17) Uani 1 1 d . . . 
C7 C 0.6206(11) 1.3219(3) 1.1716(2) 0.0466(16) Uani 1 1 d . . . 
C8 C 0.4583(8) 1.2648(3) 1.1841(2) 0.0528(19) Uani 1 1 d . . . 
H8A H 0.5167 1.2158 1.1894 0.079 Uiso 1 1 calc R . . 
H8B H 0.3673 1.2634 1.1513 0.079 Uiso 1 1 calc R . . 
H8C H 0.3881 1.2791 1.2194 0.079 Uiso 1 1 calc R . . 
C9 C 0.5191(8) 1.3992(3) 1.1637(3) 0.064(2) Uani 1 1 d . . . 
H9A H 0.4123 1.3946 1.1357 0.096 Uiso 1 1 calc R . . 
H9B H 0.6145 1.4352 1.1494 0.096 Uiso 1 1 calc R . . 
H9C H 0.4673 1.4159 1.2011 0.096 Uiso 1 1 calc R . . 
C10 C 0.6630(10) 1.2838(2) 1.0590(2) 0.0468(17) Uani 1 1 d . . . 
H10A H 0.7417 1.3037 1.0266 0.056 Uiso 1 1 calc R . . 
H10B H 0.5317 1.3064 1.0575 0.056 Uiso 1 1 calc R . . 
C11 C 0.8443(10) 1.0937(4) 1.1342(2) 0.0447(16) Uani 1 1 d . . . 
C12 C 0.7234(10) 1.0207(3) 1.1255(2) 0.0399(19) Uani 1 1 d . . . 
C13 C 0.7877(10) 0.8623(3) 1.1339(3) 0.0478(19) Uani 1 1 d . . . 
C14 C 0.8800(12) 0.8189(4) 1.0926(3) 0.063(2) Uani 1 1 d . . . 
C15 C 0.8066(13) 0.7508(4) 1.0742(3) 0.086(3) Uani 1 1 d . . . 
H15 H 0.8787 0.7209 1.0481 0.104 Uiso 1 1 calc R . . 
C16 C 0.6266(16) 0.7276(4) 1.0948(3) 0.095(3) Uani 1 1 d . . . 
H16 H 0.5685 0.6840 1.0797 0.114 Uiso 1 1 calc R . . 
C17 C 0.5318(12) 0.7679(4) 1.1371(3) 0.090(3) Uani 1 1 d . . . 
H17 H 0.4149 0.7495 1.1537 0.107 Uiso 1 1 calc R . . 
C18 C 0.6078(13) 0.8360(4) 1.1556(3) 0.067(2) Uani 1 1 d . . . 
H18 H 0.5377 0.8647 1.1830 0.080 Uiso 1 1 calc R . . 
C19 C 0.5280(9) 1.0280(3) 1.1590(2) 0.047(2) Uani 1 1 d . . . 
H19A H 0.4469 1.0660 1.1397 0.057 Uiso 1 1 calc R . . 
H19B H 0.4574 0.9803 1.1565 0.057 Uiso 1 1 calc R . . 
C20 C 0.5498(10) 1.0490(3) 1.2235(2) 0.057(2) Uani 1 1 d . . . 
H20 H 0.6694 1.0377 1.2423 0.068 Uiso 1 1 calc R . . 
C21 C 0.4123(14) 1.0816(6) 1.2540(3) 0.074(3) Uani 1 1 d . . . 
H21A H 0.452(7) 1.087(3) 1.2969(15) 0.040(15) Uiso 1 1 d . . . 
H21B H 0.298(7) 1.095(3) 1.239(2) 0.04(2) Uiso 1 1 d . . . 
C22 C 0.6944(10) 0.9992(3) 1.0596(3) 0.0417(18) Uani 1 1 d . . . 
C23 C 0.8596(12) 0.9972(3) 1.0223(3) 0.0508(18) Uani 1 1 d . . . 
H23 H 0.9836 1.0112 1.0369 0.061 Uiso 1 1 calc R . . 
C24 C 0.8418(12) 0.9746(3) 0.9635(3) 0.059(2) Uani 1 1 d . . . 
H24 H 0.9513 0.9744 0.9383 0.070 Uiso 1 1 calc R . . 
C25 C 0.6563(13) 0.9526(3) 0.9439(2) 0.0533(18) Uani 1 1 d . . . 
C26 C 0.4913(10) 0.9527(3) 0.9791(3) 0.053(2) Uani 1 1 d . . . 
H26 H 0.3688 0.9371 0.9643 0.064 Uiso 1 1 calc R . . 
C27 C 0.5105(10) 0.9771(3) 1.0385(3) 0.050(2) Uani 1 1 d . . . 
H27 H 0.3999 0.9782 1.0632 0.060 Uiso 1 1 calc R . . 
 
loop_ 
 _atom_site_aniso_label 
 _atom_site_aniso_U_11 
 _atom_site_aniso_U_22 
 _atom_site_aniso_U_33 
 _atom_site_aniso_U_23 
 _atom_site_aniso_U_13 
 _atom_site_aniso_U_12 
Br1 0.1312(7) 0.0869(5) 0.0440(3) -0.0118(5) -0.0015(6) 0.0027(8) 
Cl 0.0766(14) 0.0736(13) 0.1427(16) -0.0017(14) 0.0343(18) 0.0106(16) 
S1 0.0593(12) 0.0467(11) 0.0382(9) 0.0059(8) -0.0065(13) -0.0092(13) 
S2 0.0749(14) 0.0429(10) 0.0637(11) 0.0004(8) -0.0213(13) 0.0060(13) 
O1 0.066(3) 0.043(3) 0.098(4) -0.002(3) -0.036(3) 0.002(3) 
O2 0.050(3) 0.063(3) 0.071(3) 0.021(3) -0.018(3) -0.014(3) 
O3 0.091(4) 0.057(3) 0.043(2) -0.002(2) 0.009(3) -0.010(3) 
N 0.040(3) 0.031(3) 0.036(3) -0.004(3) -0.008(3) -0.009(3) 
C1 0.038(4) 0.040(4) 0.046(3) -0.006(3) 0.006(4) -0.008(4) 
C2 0.042(4) 0.052(4) 0.053(4) -0.005(3) -0.004(4) -0.004(5) 
C3 0.045(4) 0.053(4) 0.045(4) -0.014(4) 0.002(4) 0.003(4) 
C4 0.052(5) 0.056(5) 0.066(4) -0.010(4) -0.003(4) -0.015(4) 
C5 0.053(5) 0.053(4) 0.065(5) -0.006(4) 0.002(4) -0.016(4) 
C6 0.045(4) 0.038(4) 0.042(4) -0.007(3) -0.002(4) -0.013(4) 
C7 0.042(4) 0.044(4) 0.054(4) -0.009(4) -0.001(4) -0.007(5) 
C8 0.037(4) 0.050(4) 0.071(4) -0.006(4) 0.014(4) -0.003(4) 
C9 0.050(5) 0.055(5) 0.087(5) -0.002(4) 0.011(4) 0.007(4) 
C10 0.062(5) 0.032(3) 0.046(3) 0.009(3) 0.006(5) -0.006(4) 
C11 0.053(5) 0.041(4) 0.040(3) -0.003(4) -0.003(5) -0.001(5) 
C12 0.051(5) 0.032(4) 0.037(4) 0.015(3) -0.010(4) -0.007(4) 
C13 0.060(5) 0.037(4) 0.046(4) 0.007(4) 0.000(4) 0.005(4) 
C14 0.069(5) 0.038(5) 0.080(5) 0.004(4) -0.003(6) -0.003(6) 
C15 0.119(8) 0.051(5) 0.090(6) -0.013(5) 0.012(6) 0.010(6) 
C16 0.115(8) 0.051(6) 0.118(7) -0.017(5) -0.005(7) -0.041(7) 
C17 0.100(7) 0.039(5) 0.129(7) 0.014(5) 0.035(7) -0.003(5) 
C18 0.087(6) 0.040(4) 0.073(5) 0.012(4) 0.041(5) 0.007(5) 
C19 0.058(5) 0.048(4) 0.037(4) 0.006(3) -0.005(4) -0.016(4) 
C20 0.073(6) 0.061(5) 0.037(4) 0.011(3) -0.002(4) -0.002(5) 
C21 0.082(7) 0.095(7) 0.043(5) 0.011(5) -0.009(6) -0.007(7) 
C22 0.048(5) 0.035(4) 0.041(4) 0.006(4) 0.002(4) 0.002(4) 
C23 0.048(5) 0.046(4) 0.058(4) -0.003(4) -0.008(5) -0.005(5) 
C24 0.065(5) 0.054(5) 0.057(4) 0.005(4) 0.006(5) 0.011(5) 
C25 0.078(5) 0.047(4) 0.035(3) 0.007(3) -0.007(5) 0.010(5) 
C26 0.058(5) 0.051(5) 0.051(4) 0.006(4) -0.011(4) -0.009(4) 
C27 0.050(5) 0.062(5) 0.037(4) -0.008(4) 0.000(4) -0.003(4) 
 
_geom_special_details 
; 
 All esds (except the esd in the dihedral angle between two l.s. planes) 
 are estimated using the full covariance matrix.  The cell esds are taken 
 into account individually in the estimation of esds in distances, angles 
 and torsion angles; correlations between esds in cell parameters are only 
 used when they are defined by crystal symmetry.  An approximate (isotropic) 
 treatment of cell esds is used for estimating esds involving l.s. planes. 
; 
 
loop_ 
 _geom_bond_atom_site_label_1 
 _geom_bond_atom_site_label_2 
 _geom_bond_distance 
 _geom_bond_site_symmetry_2 
 _geom_bond_publ_flag 
Br1 C25 1.916(5) . ? 
Cl C14 1.764(8) . ? 
S1 O3 1.436(4) . ? 
S1 O2 1.438(4) . ? 
S1 N 1.708(4) . ? 
S1 C10 1.781(4) . ? 
S2 C13 1.774(6) . ? 
S2 C12 1.873(6) . ? 
O1 C11 1.207(6) . ? 
N C11 1.391(7) . ? 
N C1 1.481(6) . ? 
C1 C6 1.537(7) . ? 
C1 C2 1.556(6) . ? 
C2 C3 1.542(7) . ? 
C3 C4 1.527(7) . ? 
C3 C7 1.558(7) . ? 
C4 C5 1.565(6) . ? 
C5 C6 1.541(7) . ? 
C6 C10 1.530(7) . ? 
C6 C7 1.582(7) . ? 
C7 C8 1.513(7) . ? 
C7 C9 1.538(7) . ? 
C11 C12 1.540(8) . ? 
C12 C19 1.522(7) . ? 
C12 C22 1.549(7) . ? 
C13 C14 1.358(8) . ? 
C13 C18 1.385(9) . ? 
C14 C15 1.366(8) . ? 
C15 C16 1.359(11) . ? 
C16 C17 1.352(9) . ? 
C17 C18 1.374(8) . ? 
C19 C20 1.509(6) . ? 
C20 C21 1.290(9) . ? 
C22 C27 1.380(7) . ? 
C22 C23 1.393(9) . ? 
C23 C24 1.392(7) . ? 
C24 C25 1.378(9) . ? 
C25 C26 1.364(8) . ? 
C26 C27 1.417(7) . ? 
 
loop_ 
 _geom_angle_atom_site_label_1 
 _geom_angle_atom_site_label_2 
 _geom_angle_atom_site_label_3 
 _geom_angle 
 _geom_angle_site_symmetry_1 
 _geom_angle_site_symmetry_3 
 _geom_angle_publ_flag 
O3 S1 O2 118.2(3) . . ? 
O3 S1 N 110.3(2) . . ? 
O2 S1 N 109.6(2) . . ? 
O3 S1 C10 108.0(3) . . ? 
O2 S1 C10 111.9(3) . . ? 
N S1 C10 96.7(2) . . ? 
C13 S2 C12 102.4(3) . . ? 
C11 N C1 116.2(5) . . ? 
C11 N S1 126.0(4) . . ? 
C1 N S1 110.1(3) . . ? 
N C1 C6 107.9(5) . . ? 
N C1 C2 115.0(5) . . ? 
C6 C1 C2 103.4(4) . . ? 
C3 C2 C1 101.8(4) . . ? 
C4 C3 C2 109.3(5) . . ? 
C4 C3 C7 103.0(5) . . ? 
C2 C3 C7 102.7(5) . . ? 
C3 C4 C5 103.6(5) . . ? 
C6 C5 C4 101.7(4) . . ? 
C10 C6 C1 108.7(4) . . ? 
C10 C6 C5 117.9(5) . . ? 
C1 C6 C5 105.4(5) . . ? 
C10 C6 C7 116.5(5) . . ? 
C1 C6 C7 104.6(5) . . ? 
C5 C6 C7 102.4(4) . . ? 
C8 C7 C9 107.2(5) . . ? 
C8 C7 C3 115.5(5) . . ? 
C9 C7 C3 115.1(5) . . ? 
C8 C7 C6 115.1(5) . . ? 
C9 C7 C6 112.6(5) . . ? 
C3 C7 C6 90.8(4) . . ? 
C6 C10 S1 107.0(4) . . ? 
O1 C11 N 117.9(6) . . ? 
O1 C11 C12 120.6(6) . . ? 
N C11 C12 120.9(5) . . ? 
C19 C12 C11 108.6(5) . . ? 
C19 C12 C22 113.1(5) . . ? 
C11 C12 C22 113.4(5) . . ? 
C19 C12 S2 111.5(4) . . ? 
C11 C12 S2 101.8(4) . . ? 
C22 C12 S2 108.0(4) . . ? 
C14 C13 C18 116.8(7) . . ? 
C14 C13 S2 122.5(6) . . ? 
C18 C13 S2 120.7(6) . . ? 
C13 C14 C15 122.9(8) . . ? 
C13 C14 Cl 120.5(6) . . ? 
C15 C14 Cl 116.3(7) . . ? 
C16 C15 C14 118.9(8) . . ? 
C17 C16 C15 120.1(8) . . ? 
C16 C17 C18 120.2(8) . . ? 
C17 C18 C13 120.8(7) . . ? 
C20 C19 C12 114.7(5) . . ? 
C21 C20 C19 123.8(7) . . ? 
C27 C22 C23 119.8(6) . . ? 
C27 C22 C12 120.9(6) . . ? 
C23 C22 C12 119.1(6) . . ? 
C24 C23 C22 121.0(7) . . ? 
C25 C24 C23 117.7(7) . . ? 
C26 C25 C24 123.2(6) . . ? 
C26 C25 Br1 118.3(6) . . ? 
C24 C25 Br1 118.5(6) . . ? 
C25 C26 C27 118.6(6) . . ? 
C22 C27 C26 119.6(6) . . ? 
 
loop_ 
 _geom_torsion_atom_site_label_1 
 _geom_torsion_atom_site_label_2 
 _geom_torsion_atom_site_label_3 
 _geom_torsion_atom_site_label_4 
 _geom_torsion 
 _geom_torsion_site_symmetry_1 
 _geom_torsion_site_symmetry_2 
 _geom_torsion_site_symmetry_3 
 _geom_torsion_site_symmetry_4 
 _geom_torsion_publ_flag 
O3 S1 N C11 -51.9(5) . . . . ? 
O2 S1 N C11 80.0(5) . . . . ? 
C10 S1 N C11 -163.9(5) . . . . ? 
O3 S1 N C1 96.1(4) . . . . ? 
O2 S1 N C1 -132.1(4) . . . . ? 
C10 S1 N C1 -15.9(4) . . . . ? 
C11 N C1 C6 -178.6(5) . . . . ? 
S1 N C1 C6 30.0(5) . . . . ? 
C11 N C1 C2 -63.8(7) . . . . ? 
S1 N C1 C2 144.8(5) . . . . ? 
N C1 C2 C3 -124.9(5) . . . . ? 
C6 C1 C2 C3 -7.6(6) . . . . ? 
C1 C2 C3 C4 -66.1(6) . . . . ? 
C1 C2 C3 C7 42.8(6) . . . . ? 
C2 C3 C4 C5 72.8(6) . . . . ? 
C7 C3 C4 C5 -36.0(6) . . . . ? 
C3 C4 C5 C6 -1.6(6) . . . . ? 
N C1 C6 C10 -32.2(6) . . . . ? 
C2 C1 C6 C10 -154.5(5) . . . . ? 
N C1 C6 C5 -159.5(4) . . . . ? 
C2 C1 C6 C5 78.2(6) . . . . ? 
N C1 C6 C7 92.9(5) . . . . ? 
C2 C1 C6 C7 -29.3(6) . . . . ? 
C4 C5 C6 C10 167.3(5) . . . . ? 
C4 C5 C6 C1 -71.2(5) . . . . ? 
C4 C5 C6 C7 38.0(6) . . . . ? 
C4 C3 C7 C8 174.7(5) . . . . ? 
C2 C3 C7 C8 61.1(6) . . . . ? 
C4 C3 C7 C9 -59.4(6) . . . . ? 
C2 C3 C7 C9 -173.0(5) . . . . ? 
C4 C3 C7 C6 56.2(5) . . . . ? 
C2 C3 C7 C6 -57.4(5) . . . . ? 
C10 C6 C7 C8 53.7(7) . . . . ? 
C1 C6 C7 C8 -66.4(6) . . . . ? 
C5 C6 C7 C8 -176.2(5) . . . . ? 
C10 C6 C7 C9 -69.7(7) . . . . ? 
C1 C6 C7 C9 170.2(5) . . . . ? 
C5 C6 C7 C9 60.4(6) . . . . ? 
C10 C6 C7 C3 172.5(5) . . . . ? 
C1 C6 C7 C3 52.4(5) . . . . ? 
C5 C6 C7 C3 -57.3(5) . . . . ? 
C1 C6 C10 S1 20.6(6) . . . . ? 
C5 C6 C10 S1 140.4(5) . . . . ? 
C7 C6 C10 S1 -97.3(6) . . . . ? 
O3 S1 C10 C6 -117.1(4) . . . . ? 
O2 S1 C10 C6 111.1(5) . . . . ? 
N S1 C10 C6 -3.2(5) . . . . ? 
C1 N C11 O1 -2.2(8) . . . . ? 
S1 N C11 O1 144.1(5) . . . . ? 
C1 N C11 C12 168.3(5) . . . . ? 
S1 N C11 C12 -45.4(7) . . . . ? 
O1 C11 C12 C19 112.7(6) . . . . ? 
N C11 C12 C19 -57.6(6) . . . . ? 
O1 C11 C12 C22 -120.7(6) . . . . ? 
N C11 C12 C22 69.0(7) . . . . ? 
O1 C11 C12 S2 -5.0(7) . . . . ? 
N C11 C12 S2 -175.3(4) . . . . ? 
C13 S2 C12 C19 78.9(5) . . . . ? 
C13 S2 C12 C11 -165.5(4) . . . . ? 
C13 S2 C12 C22 -45.9(5) . . . . ? 
C12 S2 C13 C14 108.2(6) . . . . ? 
C12 S2 C13 C18 -72.3(6) . . . . ? 
C18 C13 C14 C15 -2.6(10) . . . . ? 
S2 C13 C14 C15 176.9(5) . . . . ? 
C18 C13 C14 Cl -175.9(5) . . . . ? 
S2 C13 C14 Cl 3.6(8) . . . . ? 
C13 C14 C15 C16 4.9(12) . . . . ? 
Cl C14 C15 C16 178.4(7) . . . . ? 
C14 C15 C16 C17 -6.5(13) . . . . ? 
C15 C16 C17 C18 6.0(13) . . . . ? 
C16 C17 C18 C13 -3.8(12) . . . . ? 
C14 C13 C18 C17 2.0(10) . . . . ? 
S2 C13 C18 C17 -177.5(5) . . . . ? 
C11 C12 C19 C20 -53.2(7) . . . . ? 
C22 C12 C19 C20 -179.9(4) . . . . ? 
S2 C12 C19 C20 58.2(6) . . . . ? 
C12 C19 C20 C21 156.1(7) . . . . ? 
C19 C12 C22 C27 -10.2(9) . . . . ? 
C11 C12 C22 C27 -134.4(7) . . . . ? 
S2 C12 C22 C27 113.7(6) . . . . ? 
C19 C12 C22 C23 174.3(5) . . . . ? 
C11 C12 C22 C23 50.2(8) . . . . ? 
S2 C12 C22 C23 -61.8(6) . . . . ? 
C27 C22 C23 C24 1.3(10) . . . . ? 
C12 C22 C23 C24 176.8(5) . . . . ? 
C22 C23 C24 C25 -1.5(9) . . . . ? 
C23 C24 C25 C26 0.6(10) . . . . ? 
C23 C24 C25 Br1 -178.8(4) . . . . ? 
C24 C25 C26 C27 0.5(10) . . . . ? 
Br1 C25 C26 C27 179.9(4) . . . . ? 
C23 C22 C27 C26 -0.1(10) . . . . ? 
C12 C22 C27 C26 -175.6(5) . . . . ? 
C25 C26 C27 C22 -0.7(10) . . . . ? 
 
_diffrn_measured_fraction_theta_max    0.999 
_diffrn_reflns_theta_full              25.02 
_diffrn_measured_fraction_theta_full   0.999 
_refine_diff_density_max    0.289 
_refine_diff_density_min   -0.482 
_refine_diff_density_rms    0.049 
